# Supplementary material
Source: publisher site journal article supplement (https://www.dovepress.com/article/326092)
Supplement: Supplementary file 1 [file get_supplementary_file.php]

**Supplementary Figure Legend**

**Supplementary Figure 1:** Evolution of pharmaceutical consumption during the 2-year observational period.





(ꝉ) p ≤ 0.001.
